# Supplementary material
Source: MDPI journal article supplement (https://www.mdpi.com/1424-2818/13/9/449)
Supplement: s1 [file s1]

Archive with 5 entries (4 files):
- diversity-1347788 sup revised - Final/
- diversity-1347788 sup revised - Final/Fig S1 SNPs_1.xlsx
- diversity-1347788 sup revised - Final/Fig S2 MDS breeds rev - Copy.pdf
- diversity-1347788 sup revised - Final/Tab S1 primer 1.xlsx
- diversity-1347788 sup revised - Final/Tab S2 accessions rev.xlsx
