# Supplementary material
Source: MDPI journal article supplement (https://www.mdpi.com/1424-2818/13/9/449)
Supplement: s1 [file s1 › diversity-1347788 sup revised - Final/Fig S1 SNPs_1.xlsx]

## Sheet: Tabelle1
Fig. S1: Observed SNPs in 320 bp of mtDNA d-loop fragments of cattle from the sites Savognin-Padnal (PA), Brixen Albanbühel (ALB), Vahrn-Nössingbühel (NOS), Klausen Gufidaun-Plank (KLA). Haplogroup identification according to Achilli et al 2009, Scheu et al 2015, Olivieri et al 2015; diagnostic positions in grey.
position	15908	15939	15953	15955	15964	15981	15989	16016	16042	16044	16051	16057	16061	16074	16076	16093	16104	16108	16121	16128	16129	16141	16147	16185	16200	16246	16248	16250	16255	haplogroup	Genbank No.
Reference V00654	g	g	c	c	a	g	g	t	t	c	t	g	t	t	a	g	c	t	g	t	a	t	t	g	g	t	c	a	t	T3
PA13																														T3
PA10																														T3
PA14																														T3
PA1																														T3
PA17																														T3
PA18																														T3
PA19																														T3
PA23																														T3
ALB10																														T3
ALB12																														T3
ALB16																														T3
ALB29																														T3
NOS2																														T3
NOS3																														T3
NOS4																														T3
NOS7																														T3
NOS1																														T3
PA20				t																										T3
PA24							a																							T3
ALB15								c																						T3
KLA37															g															T3
ALB8																a														T3
ALB26																			a											T3
PA8																						c								T3
PA3																				c										T3
PA22																					g		c							T3
ALB9														c														g		T3
PA9	a					a																								T3
PA15		a															t								a					T3
ALB32											c	a	c																	T3
PA4										t		c												a					c	T2
PA78												c												a					c	T2
ALB27												c						c						a					c	T2
ALB30					g							c												a					c	T2
ALB31									c																					T3/T4
ALB28									c																					T3/T4
KLA35									c																	c				T3/T4
PA20			g																										c	Q
PA7			g																										c	Q
