# Supplementary material
Source: MDPI journal article supplement (https://www.mdpi.com/1424-2818/13/9/449)
Supplement: s1 [file s1 › diversity-1347788 sup revised - Final/Fig S2 MDS breeds rev - Copy.pdf]

Fig S2: MDS plot based on Reynolds distances obtained from different cattle breeds (see Table S2 for breed identifications). In pink Albanbühel (29) in red Padnal (28), in light blue eastern European breeds, in dark blue western European breeds, in black Italian breeds, in green Swiss breeds and in yellow northern European breeds.

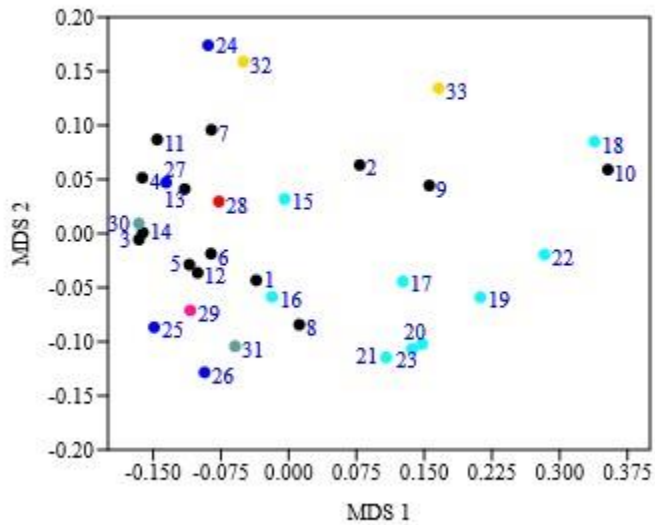

Stressfactor 0.19
