# Supplementary material
Source: MDPI journal article supplement (https://www.mdpi.com/1424-2818/13/9/449)
Supplement: s1 [file s1 › diversity-1347788 sup revised - Final/Tab S1 primer 1.xlsx]

## Sheet: Tabelle1
Table S1: Primer for PCR and sequencing used in this study, after
	Bollongino, R. Die Herkunft der Hausrinder in Europa. Eine aDNA-Studie an neolithischen Knochenfunden. Mainz, Mainz, 2005.
primer name	sequence 5'-3'	position (V00654)	target length without primer (bp)	annealing temperature (°C)
H1	gca ccc taa cca aat att aca aac ac	15,877-15,902	H1/L2: 121	54
L2	gtc atg tac ttg ctt ata tgc atg gg	16,024-16,049
H1a	cca tac aca gac cac aga atg aat	15,923-15,946	H1a/L2: 77	52-54
L2a	tgt aca tta ccc ctt gcg tag g	15,949-15,970	H1/L2a: 46	54
H3	tat gcc cca tgc ata taa gca a	16,019-16,040	H3/L4: 112	52-55
L4	cgg cat ggt aat taa gct cgt g	16,153-16,174
H5	tac cat gcc gcg tga aac ca	16,165-16,184	H5/L6: 87	52-53
L6	tga gat ggc cct gaa gaa aga a	16,272-16,293
L7	tcc atc gag atg tct tat tta aga gga	16,313-16,339	H5/L7: 128
40 bp tail	AACTGACTAAACTAGGTGCCACGTCGTGAAAGTCTGACAA
H1_seq	AACTGACTAAACTAGGTGCCACGTCGTGAAAGTCTGACAAGCACCCTAACCAAATATTACAAACAC
L2_seq	AACTGACTAAACTAGGTGCCACGTCGTGAAAGTCTGACAAGTCATGTACTTGCTTATATGCATGGG
H1a_seq	AACTGACTAAACTAGGTGCCACGTCGTGAAAGTCTGACAACCATACACAGACCACAGAATGAAT
L2a_seq	AACTGACTAAACTAGGTGCCACGTCGTGAAAGTCTGACAATGTACATTACCCCTTGCGTAGG
H3_seq	AACTGACTAAACTAGGTGCCACGTCGTGAAAGTCTGACAATATGCCCCATGCATATAAGCAA
L4_seq	AACTGACTAAACTAGGTGCCACGTCGTGAAAGTCTGACAACGGCATGGTAATTAAGCTCGTG
H5_seq	AACTGACTAAACTAGGTGCCACGTCGTGAAAGTCTGACAATACCATGCCGCGTGAAACCA
L6_seq	AACTGACTAAACTAGGTGCCACGTCGTGAAAGTCTGACAATGAGATGGCCCTGAAGAAAGAA
L7_seq	AACTGACTAAACTAGGTGCCACGTCGTGAAAGTCTGACAATCCATCGAGATGTCTTATTTAAGAGGA
