# Supplementary material
Source: MDPI journal article supplement (https://www.mdpi.com/1424-2818/13/9/449)
Supplement: s1 [file s1 › diversity-1347788 sup revised - Final/Tab S2 accessions rev.xlsx]

## Sheet: Tabelle1
Table S2: Sequences used for population statistics and MDS Plots
Breed code	Geographic region/Genbank number		breed name
MDS Figure S2
	Chalcolithic Romania/Bulgaria
	KF307220.1		archaeological sample
	KF307221.1		archaeological sample
	KF307222.1		archaeological sample
	KF307238.1		archaeological sample
	KF307239.1		archaeological sample
	KF307240.1		archaeological sample
	KF307241.1		archaeological sample
	KF307279.1		archaeological sample
	Italy
1	AY700565	REN32	Rendena
1	AY700564	REN30
1	AY700563	REN29
1	AY700562	REN28
1	AY700561	REN27
1	AY700560	REN26
1	AY700559	REN25
1	AY700558	REN5
1	AY700557	REN4
1	AY700556	REN2
2	AY700555	ROM11	Romagnola
2	AY700554	ROM10
2	AY700553	ROM9
2	AY700552	ROM8
2	AY700551	ROM7
2	AY700550	ROM6
2	AY700549	ROM5
2	AY700548	ROM3
2	AY700547	ROM2
2	AY700546	ROM1
2	AY700545	ROM117
2	AY700544	ROM118
2	AY700543	ROM119
2	AY700542	ROM129
2	AY700541	ROM133
3	AY700540	PIM31	Piedmontese
3	AY700539	PIM37
3	AY700538	PIM38
3	AY700537	PIM40
3	AY700536	PIM47
3	AY700535	PIM34
3	AY700534	PIM18
3	AY700533	PIM14
3	AY700532	PIM7
3	AY700531	PIM4
3	AY700530	PIM1
4	AY700529	PRI17	Italian red pied
4	AY700528	PRI27
4	AY700527	PRI30
4	AY700526	PRI31
4	AY700525	PRI32
4	AY700524	PRI33
4	AY700523	PRI34
4	AY700522	PRI35
4	AY700521	PRI38
4	AY700520	PRI39
4	AY700519	PRI28
5	AY700518	MMAL86	Maremmana
5	AY700517	MMAL85
5	AY700516	MMAL59
5	AY700515	MMAL12
5	AY700514	MMAL92
5	AY700513	MMAL157
5	AY700512	MMA128
5	AY700511	MMAl166
5	AY700510	MMAl115
5	AY700509	MMA172
5	AY700508	MMA223
5	AY700507	MMAL16
5	AY700506	MMAL2
6	AY700505	CHI261	Chianina
6	AY700504	CHI239
6	AY700503	CHI229
6	AY700502	CHI223
6	AY700501	CHI222
6	AY700500	CHI217
6	AY700499	CHI215
6	AY700498	CHI210
6	AY700497	CHI207
6	AY700496	CHI206
6	AY700495	CHI199
6	AY700494	CHI198
6	AY700493	CHI193
6	AY700492	CHI189
6	AY700491	CHI186
6	AY700490	CHI185
6	AY700489	CHI184
6	AY700488	CHI174
6	AY700487	CHI166
6	AY700486	CHI165
6	AY700485	CHI146
6	AY700484	CHI125
6	AY700483	CHI103
6	AY700482	CHI32
6	AY700481	CHI42
6	AY700480	CHI36
6	AY700479	CHI20
6	AY700478	CHI15
6	AY700477	CHI6
6	AY700476	CHI4
6	AY700475	CHI2
6	AY700474	CHI1
7	AY700473	POD37	Italian Podolian
7	AY700472	POD36
7	AY700471	POD35
7	AY700470	POD33
7	AY700469	POD34
7	AY700468	POD32
7	AY700467	POD31
7	AY700466	POD30
7	AY700465	POD29
7	AY700464	POD28
7	AY700463	POD27
7	AY700462	POD26
7	AY700461	POD25
7	AY700460	POD24
7	AY700459	POD23
7	AY700458	POD22
7	AY700457	POD21
7	AY700456	POD20
7	AY700455	POD19
7	AY700454	POD18
7	AY700453	POD17
7	AY700452	POD16
7	AY700451	POD15
7	AY700450	POD14
7	AY700449	POD13
7	AY700448	POD12
7	AY700447	POD10
7	AY700446	POD8
7	AY700445	POD7
7	AY700444	POD6
7	AY700443	POD5
7	AY700442	POD4
7	AY700441	POD2
7	AY700440	POD1
8	AY700439	CIN8	Cinisara
8	AY700438	CIN7
8	AY700437	CIN6
8	AY700436	CIN5
8	AY700435	CIN4
8	AY700434	CIN3
8	AY700433	CIN2
8	AY700432	CIN1
9	AY700431	CAL38	Calvana
9	AY700430	CAL28
9	AY700429	CAL27
9	AY700428	CAL26
9	AY700427	CAL20
9	AY700426	CAL17
9	AY700425	CAL12
9	AY700424	CAL6
9	AY700423	CAL5
10	AY700422	CAB13	Cabannina
10	AY700421	CAB12
10	AY700420	CAB11
10	AY700419	CAB10
10	AY700418	CAB9
10	AY700417	CAB8
10	AY700416	CAB7
10	AY700415	CAB6
10	AY700414	CAB5
10	AY700413	CAB4
10	AY700412	CAB3
10	AY700411	CAB2
11	AY700410	MOD12	Modicana
11	AY700409	MOD11
11	AY700408	MOD10
11	AY700407	MOD8
11	AY700406	MOD7
11	AY700405	MOD5
11	AY700404	MOD4
11	AY700402	MOD2
12	DQ515378	EURO140	Italian Maremmana
12	DQ515377	EURO139
12	DQ515376	EURO138
12	DQ515375	EURO137
12	DQ515374	EURO136
12	DQ515373	EURO135
12	DQ515372	EURO134
12	DQ515371	EURO133
12	DQ515370	EURO132
12	DQ515369	EURO131
12	DQ515368	EURO130
12	DQ515367	EURO129
12	DQ515366	EURO128
12	DQ515365	EURO127
12	DQ515364	EURO126
12	DQ515363	EURO125
12	DQ515362	EURO124
12	DQ515361	EURO123
12	DQ515360	EURO122
12	DQ515359	EURO121
12	DQ515358	EURO120
not included in Figure S2	DQ515357	ITCIN01	Italian Cinisara
not included in Figure S2	DQ515356	ITCIN02
not included in Figure S2	DQ515355	ITCIN04
not included in Figure S2	DQ515354	ITCIN08
13	DQ515353	ITMCG10	Italian Marquisana
13	DQ515352	ITMCG11
13	DQ515351	ITMCC12
13	DQ515350	ITMCG14
13	DQ515349	ITMCG15
13	DQ515348	ITMCG16
13	DQ515347	ITMCG06
13	DQ515346	ITMCG07
13	DQ515345	ITMCG08
13	DQ515344	ITMCG09
14	DQ515343	ITPRI27	Italian Peseta rossa
14	DQ515342	ITPRI28
14	DQ515341	ITPRI30
14	DQ515340	ITPRI31
14	DQ515339	ITPRI32
14	DQ515338	ITPRI33
14	DQ515337	ITPRI34
14	DQ515336	ITPRI35
14	DQ515335	ITPRI38
14	DQ515334	ITPRI39
not included in Figure S2	DQ515333	ITROM117	Italian Romagnola
not included in Figure S2	DQ515332	ITROM118
not included in Figure S2	DQ515331	ITROM119
not included in Figure S2	DQ515330	ITROM129
not included in Figure S2	DQ515329	ITROM133
	east
15	DQ515294	bulrod40	Bulgarian Rodopsa
15	DQ515293	bulrod32
15	DQ515292	bulrod28
15	DQ515291	bulrod26
15	DQ515290	bulrod20
15	DQ515289	bulrod16
15	DQ515288	bulrod06
15	DQ515287	bulrod01
16	DQ515286	albil07	Albania Illyaska
16	DQ515285	albil03
16	DQ515284	albil02
16	DQ515283	albili06
16	DQ515282	albili08
16	DQ515281	albili01
16	DQ515280	albili05
16	DQ515279	albili04
17	AF336575	Sikias1	Sikias
17	AF336574	Sikias10
17	AF336573	Sikias11
17	AF336572	Sikias12
17	AF336571	Sikias2
17	AF336570	Sikias3
17	AF336569	Sikias4
17	AF336568	Sikias5
17	AF336567	Sikias6
17	AF336566	Sikias7
17	AF336565	Sikias8
17	AF336564	Sikias9
18	DQ515400	HUHSG88	Hungarian Grey Steppe
18	DQ515399	HUHSG92
18	DQ515398	HUHSG89
18	DQ515397	HUHSG99
18	DQ515396	HUHSG95
18	DQ515395	HUHSG98
18	DQ515394	HUHSG97
18	DQ515393	HUHSG94
18	DQ515392	HUHSG93
18	DQ515391	HUHSG96
18	DQ515390	HUHSG91
18	DQ515389	HUHSG90
19	DQ515388	ROSUR16	Romenia Sur
19	DQ515387	ROSUR02
19	DQ515386	ROSUR12
19	DQ515385	ROSUR08
19	DQ515384	ROSUR07
19	DQ515383	ROSUR06
19	DQ515382	ROSUR05
19	DQ515381	ROSUR04
19	DQ515380	ROSUR03
19	DQ515379	ROSUR01
20	DQ515328	SERBUS31	Serbia Busa
20	DQ515327	SERBUS36
20	DQ515326	SERBUS35
20	DQ515325	SERBUS30
20	DQ515324	SERBUS33
20	DQ515323	SERBUS32
20	DQ515322	SERBUS22
20	DQ515321	SERBUS12
20	DQ515320	SERBUS16
20	DQ515319	SERBUS15
not included in Figure S2	DQ515306	SLSYR04	Slovenia Symir
not included in Figure S2	DQ515305	SLSYR03
not included in Figure S2	DQ515304	SLSYR02
not included in Figure S2	DQ515303	SLSYR01
21	DQ515302	SKRED08	Slovakia Red
21	DQ515301	SKRED07
21	DQ515300	SKRED06
21	DQ515299	SKRED05
21	DQ515298	SKRED04
21	DQ515297	SKRED03
21	DQ515296	SKREDO2
21	DQ515295	SKREDO1
22	DQ515253	GRBRA30	Greek brachykerati
22	DQ515252	GRBRA29
22	DQ515251	GRBRA28
22	DQ515250	GRBRA27
22	DQ515249	GRBRA26
22	DQ515248	GRBRA25
22	DQ515247	GRBRA24
22	DQ515246	GRBRA23
22	DQ515245	GRBRA22
22	DQ515244	GRBRA21
22	DQ515243	GRBRA20
23	DQ515242	GRLOC19	Greek brachykerati
23	DQ515241	GRLOC38
23	DQ515240	GRLOC9
23	DQ515239	GRLOC8
23	DQ515238	GRLOC7
23	DQ515237	GRLOC6
23	DQ515236	GRLOC5
23	DQ515235	GRLOC4
23	DQ515234	GRLOC3
23	DQ515233	GRLOC2
23	DQ515232	GRLOC1
	west
24	AF336533	Char12	Charolais
24	AF336532	Char13
24	AF336531	Char14
24	AF336530	Char16
24	AF336529	Char32
24	AF336528	Char6
24	AF336527	Char4
24	AF336526	Char2
24	AF336525	Char7
24	AF336524	Char3
24	AF336523	Char1
25	AF336511	Lim_11	Limousin
25	AF336510	Lim_10
25	AF336509	Lim_9
25	AF336508	Lim_8
25	AF336507	Lim_7
25	AF336506	Lim_6
25	AF336505	Lim_5
25	AF336504	Lim_4
25	AF336503	Lim_3
25	AF336502	Lim_2
26	DQ515278	FRGAS03	French Blond Gascogne
26	DQ515277	FRGAS04
26	DQ515276	FRGAS05
26	DQ515275	FRGAS06
26	DQ515274	FRGAS14
26	DQ515273	FRGAS09
26	DQ515272	FRGAS10
26	DQ515271	FRGAS11
26	DQ515270	FRGAS13
26	DQ515269	FRGAS12
26	DQ515268	FRGAS18
27	DQ515267	FRBLO06	French Blond Aquitaine
27	DQ515266	FRBLO02
27	DQ515265	FRBLO01
27	DQ515264	FRBLO03
27	DQ515263	FRBLO04
27	DQ515262	FRBLO05
27	DQ515261	FRBLO07
27	DQ515260	FRBLO08
27	DQ515259	FRBLO12
27	DQ515258	FRBLO09
27	DQ515257	FRBLO10
27	DQ515256	FRBLO11
27	DQ515255	FRBLO13
27	DQ515254	FRBLO14
	Switzerland
30	AF336541	Simm23	Simmental
30	AF336540	Simm31
30	AF336539	Simm32
30	AF336538	Simm33
30	AF336537	Simm34
30	AF336536	Simm3
30	AF336535	Simm2
30	AF336534	Simm1
not included in Figure S2	AJ871619	Raetian Grey, isolate 4	Raetian Grey
not included in Figure S2	AJ871618	Raetian Grey, isolate 3
not included in Figure S2	AJ871617	Raetian Grey, isolate 2
not included in Figure S2	AJ871616	Raetian Grey, isolate 1
31	AJ871629	Evolene, isolate 91	Eringer
31	AJ871628	Evolene, isolate 3
31	AJ871627	Evolene, isolate 10
31	AJ871626	Evolene, isolate 4
31	AJ871625	Evolene, isolate 8
31	AJ871624	Evolene, isolate 1
31	AJ871623	Evolene, isolate 6
31	AJ871622	Evolene, isolate 2
31	AJ871621	Evolene, isolate 7
not included in Figure S2	AJ871620	Evolene, isolate 5
	North
32	AF336522	Frie21	Friesian
32	AF336521	Frie22
32	AF336520	Frie23
32	AF336519	Frie24
32	AF336518	Frie25
32	AF336517	Frie7
32	AF336516	Frie5
32	AF336515	Frie4
32	AF336514	Frie3
32	AF336513	Frie2
32	AF336512	Frie1
33	AF336552	Ger_12	German Black
33	AF336551	Ger_11
33	AF336550	Ger_10
33	AF336549	Ger_8
33	AF336548	Ger_7
33	AF336547	Ger_6
33	AF336546	Ger_5
33	AF336545	Ger_4
33	AF336544	Ger_3
33	AF336543	Ger_2
33	AF336542	Ger_1
